# Supplementary material
Source: PubMed Central journal article supplement (PMC4547321)
Supplement: DS_10.1177_0022034515595043.pdf [file DS_10.1177_0022034515595043.pdf]

# COMT Diplotype Amplifies Effect of Stress on Risk of Temporomandibular Pain

Journal of Dental Research  
DSI  
© International & American Associations  
for Dental Research 2015  
Reprints and permissions:  
sagepub.com/journalsPermissions.nav  
DOI: 10.1177/0022034515595043  
jdr.sagepub.com

G.D. Slade<sup>1,2,3</sup>, A.E. Sanders<sup>1,2</sup>, R. Ohrbach<sup>4</sup>, E. Bair<sup>1,5,6</sup>, W. Maixner<sup>1,5</sup>,  
J.D. Greenspan<sup>7,8</sup>, R.B. Fillingim<sup>9</sup>, S. Smith<sup>1,5</sup>, and L. Diatchenko<sup>10</sup>

## Appendix

**Appendix Table.** Cox Regression Models of Time-Constant and Time-Varying Influences of Psychological Stress on Hazard of First-Onset TMD: OPPERA Prospective Cohort Study.

| Model | Description                                                                  | No. of Subjects | df    | $\chi^2$ | Interaction P Value | Parameter                                                                                                  | Hazard Ratio (95% CL) |
|-------|------------------------------------------------------------------------------|-----------------|-------|----------|---------------------|------------------------------------------------------------------------------------------------------------|-----------------------|
| A1    | Model 6 from Table 2, with interaction of time-varying stress and COMT LPS   | 2,186           | 103.5 | 19       | 0.24                | Time-constant baseline PSS score (per 6.4 units)                                                           | 1.70 (1.44, 2.02)     |
|       |                                                                              |                 |       |          |                     | Stratum with 0 copies of LPS: Time-varying average quarterly PSS score minus baseline (per 6.4 units)      | 2.38 (1.59, 3.58)     |
|       |                                                                              |                 |       |          |                     | Stratum with 1 copy of LPS: Time-varying average quarterly PSS score minus baseline (per 6.4 units)        | 1.54 (1.07, 2.22)     |
|       |                                                                              |                 |       |          |                     | Stratum with 2 copies of LPS: Time-varying average quarterly PSS score minus baseline (per 6.4 units)      | 1.80 (0.91, 3.56)     |
| A2    | Model 6 from Table 2, with interaction of time-varying stress and COMT HPS   | 2186            | 99.8  | 13       | 0.22                | Time-constant baseline PSS score (per 6.4 units)                                                           | 1.72 (1.46, 2.04)     |
|       |                                                                              |                 |       |          |                     | Stratum with 0 copies of HPS: Time-varying average quarterly PSS score minus baseline (per 6.4 units)      | 1.70 (1.24, 2.34)     |
|       |                                                                              |                 |       |          |                     | Stratum with 1 to 2 copies of HPS: Time-varying average quarterly PSS score minus baseline (per 6.4 units) | 2.36 (1.47, 3.77)     |
| A3    | Model 1 from Table 2, with interaction of baseline stress and COMT diplotype | 2186            | 102.2 | 13       | 0.19                | Low-activity COMT stratum: Baseline PSS score (per 6.4 units)                                              | 1.57 (1.26, 1.95)     |
|       |                                                                              |                 |       |          |                     | High-activity COMT stratum: Baseline PSS score (per 6.4 units)                                             | 1.89 (1.52, 2.36)     |

All models include time-constant covariates of study site (4 categories), age (continuous measure), sex (2 categories), and are adjusted for population stratification using the first three eigenvectors from multidimensional scaling analysis. COMT, catechol-O-methyltransferase; HPS, high-pain sensitivity; LPS, low-pain sensitivity; OPPERA, Orofacial Pain: Prospective Evaluation and Risk Assessment; PSS, Perceived Stress Scale; TMD, temporomandibular disorder; 95% CL, 95% confidence limits for the estimated hazard ratio.

<sup>1</sup>Center for Pain Research and Innovation, University of North Carolina at Chapel Hill, Chapel Hill, NC, USA

<sup>2</sup>Department of Dental Ecology, University of North Carolina at Chapel Hill, Chapel Hill, NC, USA

<sup>3</sup>Department of Epidemiology, University of North Carolina at Chapel Hill, Chapel Hill, NC, USA

<sup>4</sup>Department of Oral Diagnostic Sciences, University at Buffalo, Buffalo, NY, USA

<sup>5</sup>Department of Endodontics, University of North Carolina at Chapel Hill, Chapel Hill, NC, USA

<sup>6</sup>Department of Biostatistics, University of North Carolina at Chapel Hill, Chapel Hill, NC, USA

<sup>7</sup>Department of Neural and Pain Sciences, University of Maryland School of Dentistry, Baltimore, MD, USA

<sup>8</sup>Brotman Facial Pain Clinic, University of Maryland School of Dentistry, Baltimore, MD, USA

<sup>9</sup>Department of Community Dentistry & Behavioral Science, University of Florida, Gainesville, FL, USA

<sup>10</sup>Allan Edwards Centre for Research on Pain, McGill University, Montreal, Quebec, Canada

### Corresponding Author:

G.D. Slade, Koury Oral Health Sciences, UNC School of Dentistry, Room 4501E, 385 South Columbia Street, CB#7455, Chapel Hill, NC 27599-7455, USA.

Email: gary\_slade@dentistry.unc.edu
